# Supplementary material
Source: PubMed Central journal article supplement (PMC6349032)

Figure S1

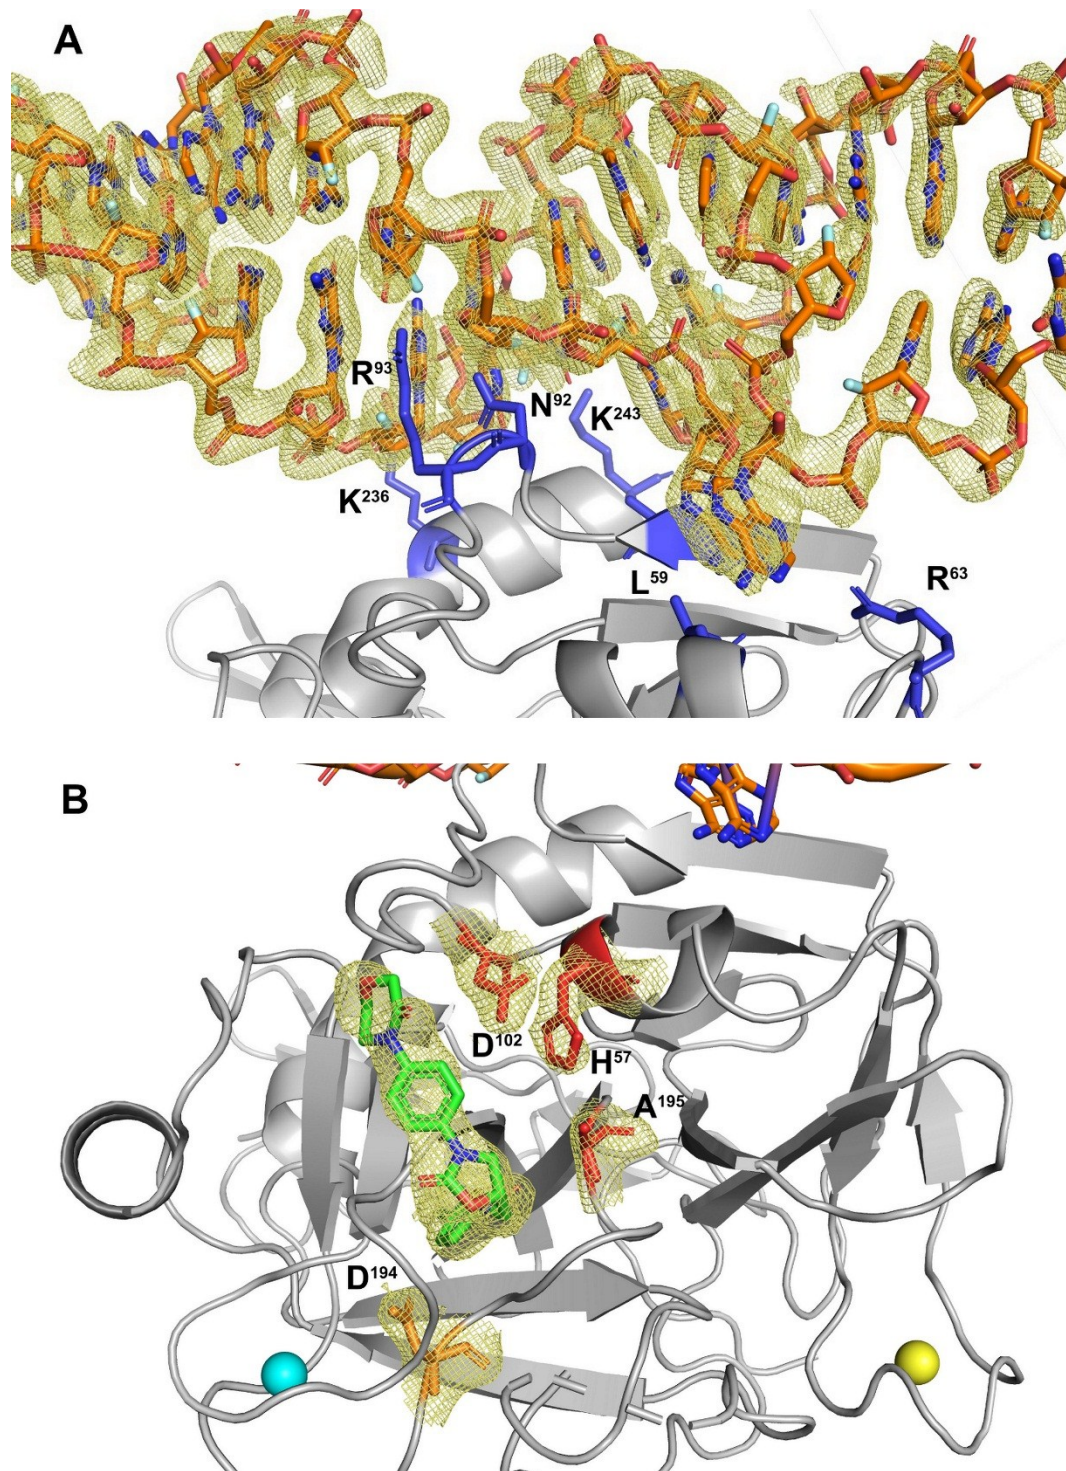

Figure S2

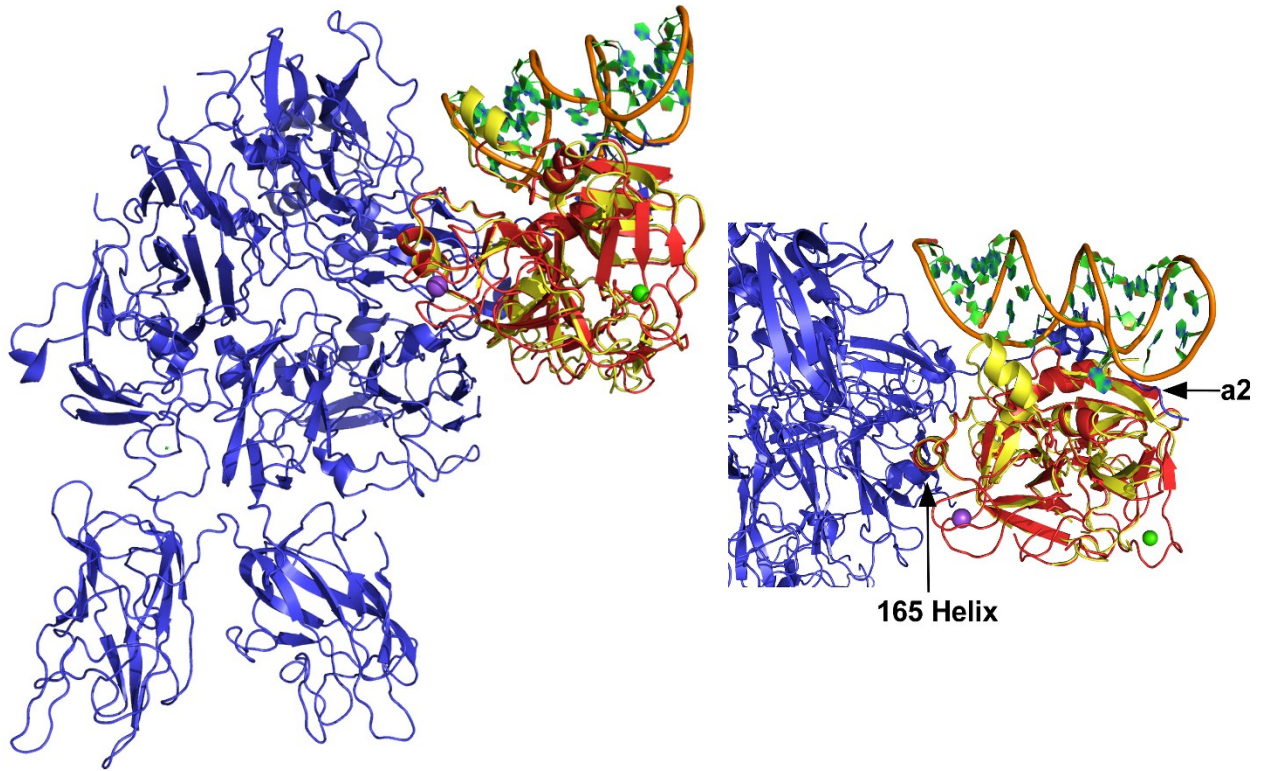

Figure S3

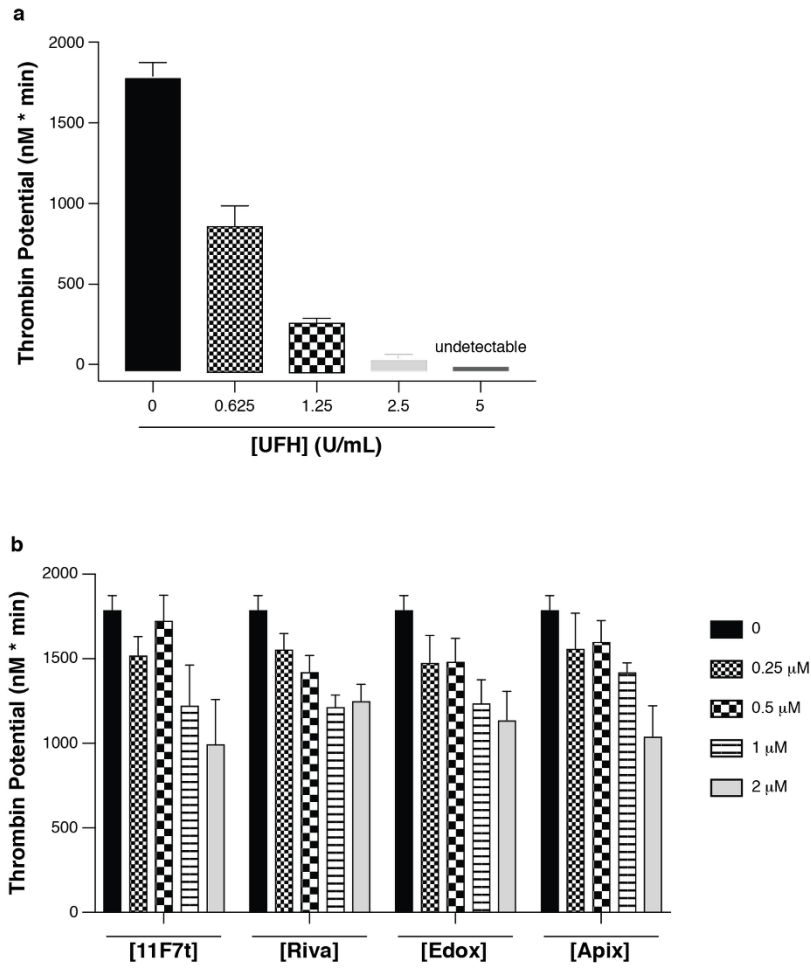

Figure S4

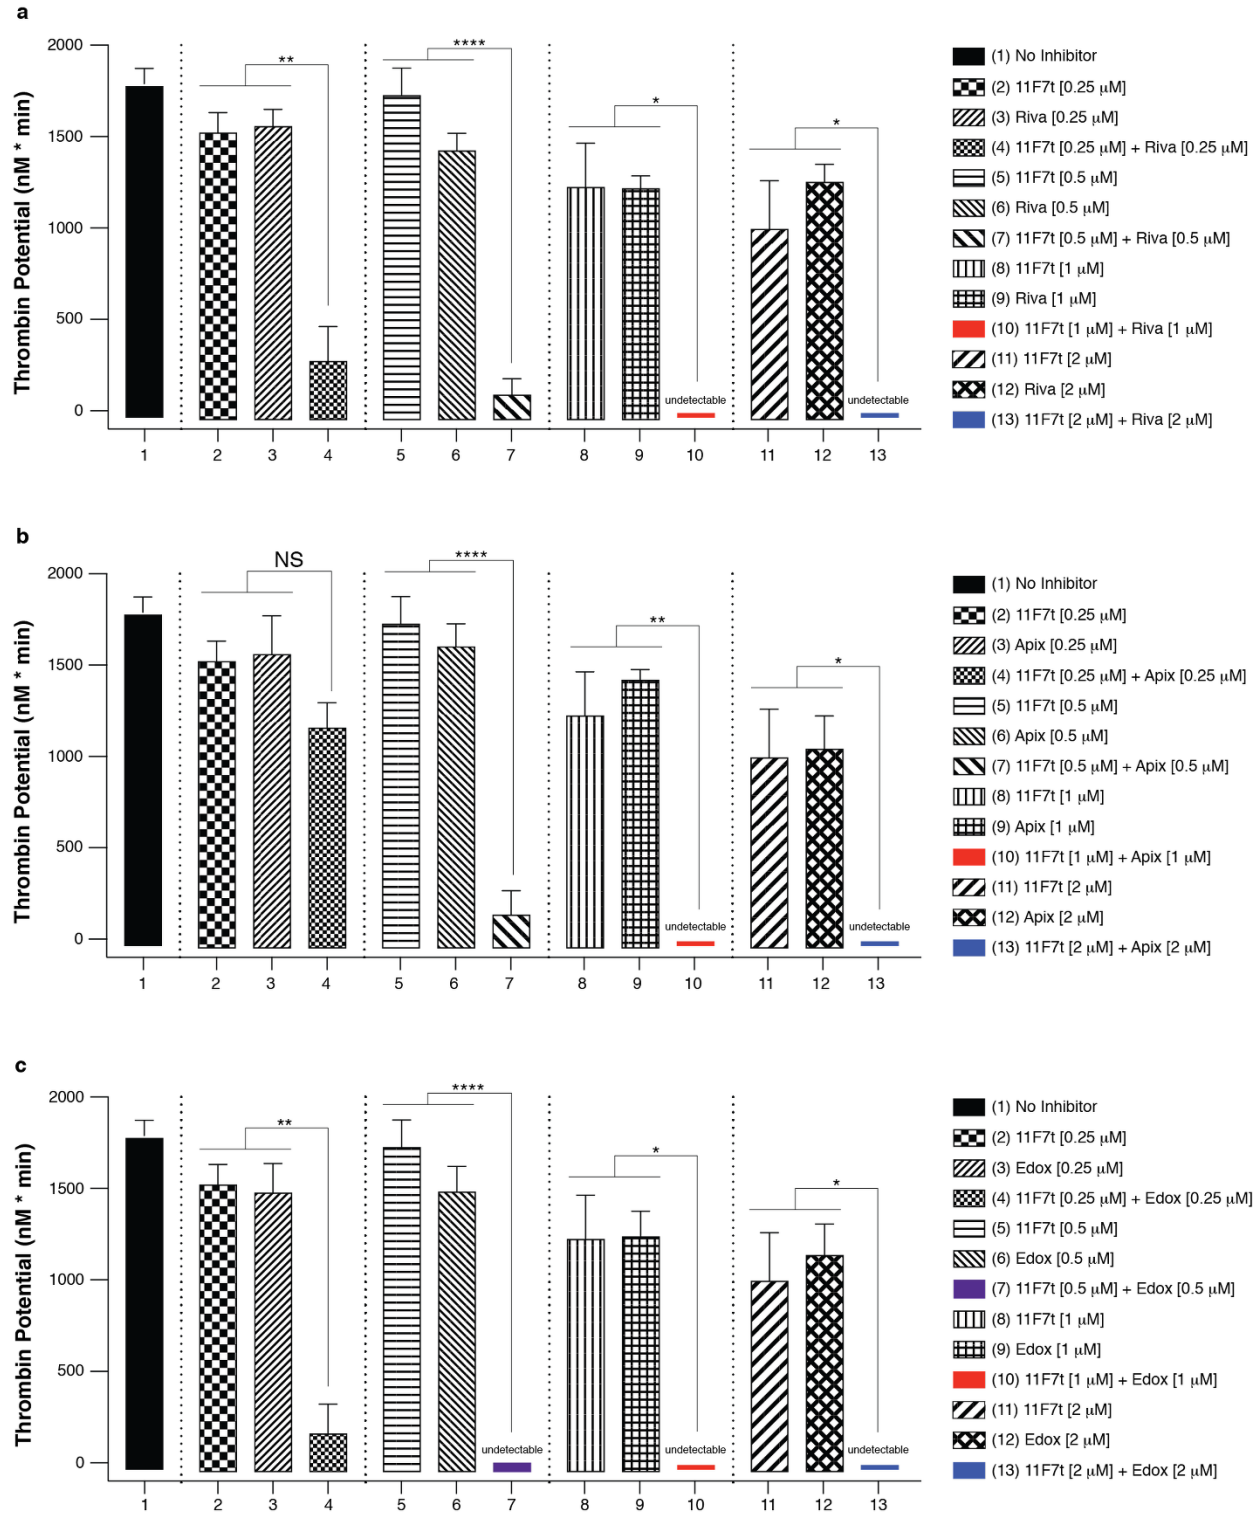



Figure S5

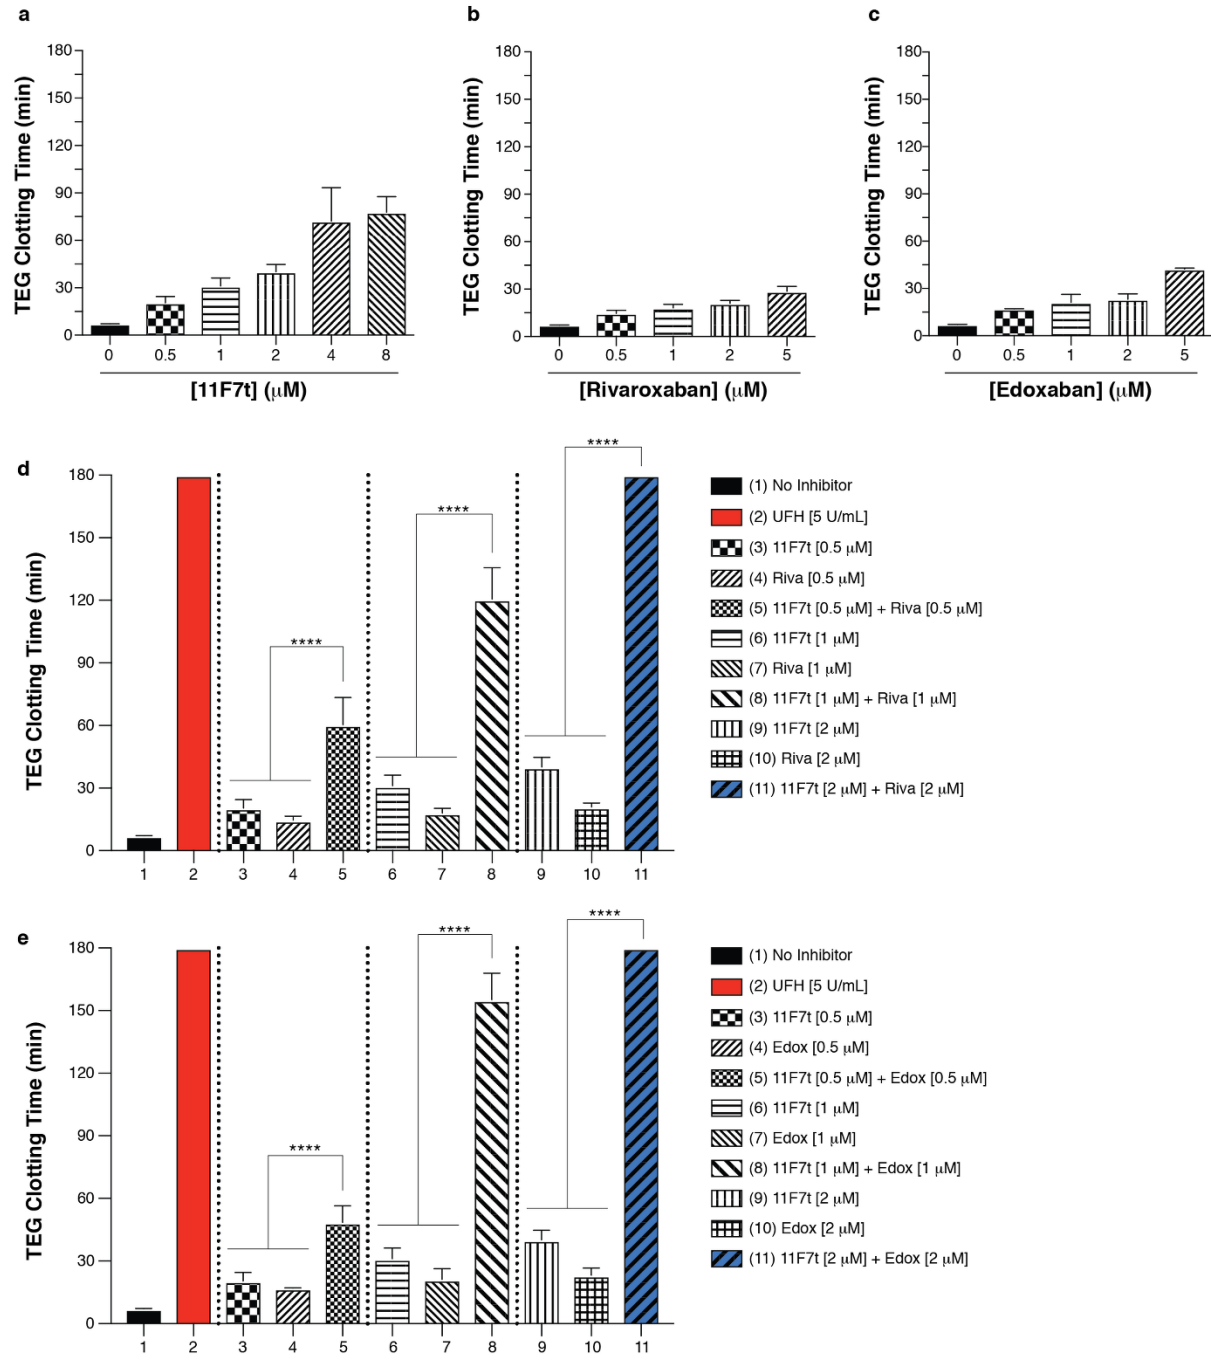

Figure S6

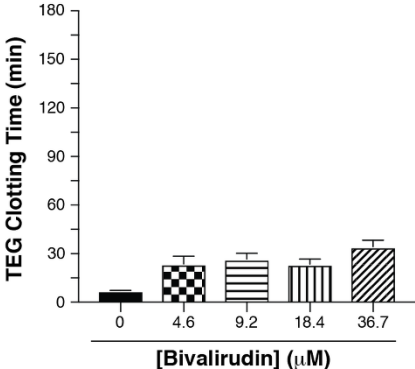

Figure S7

a

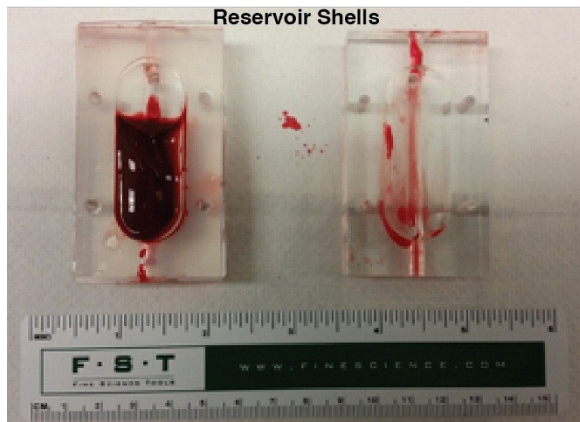

b

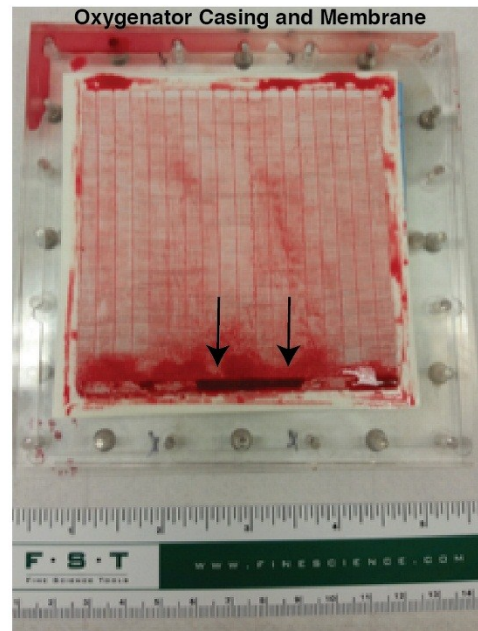

Figure S8

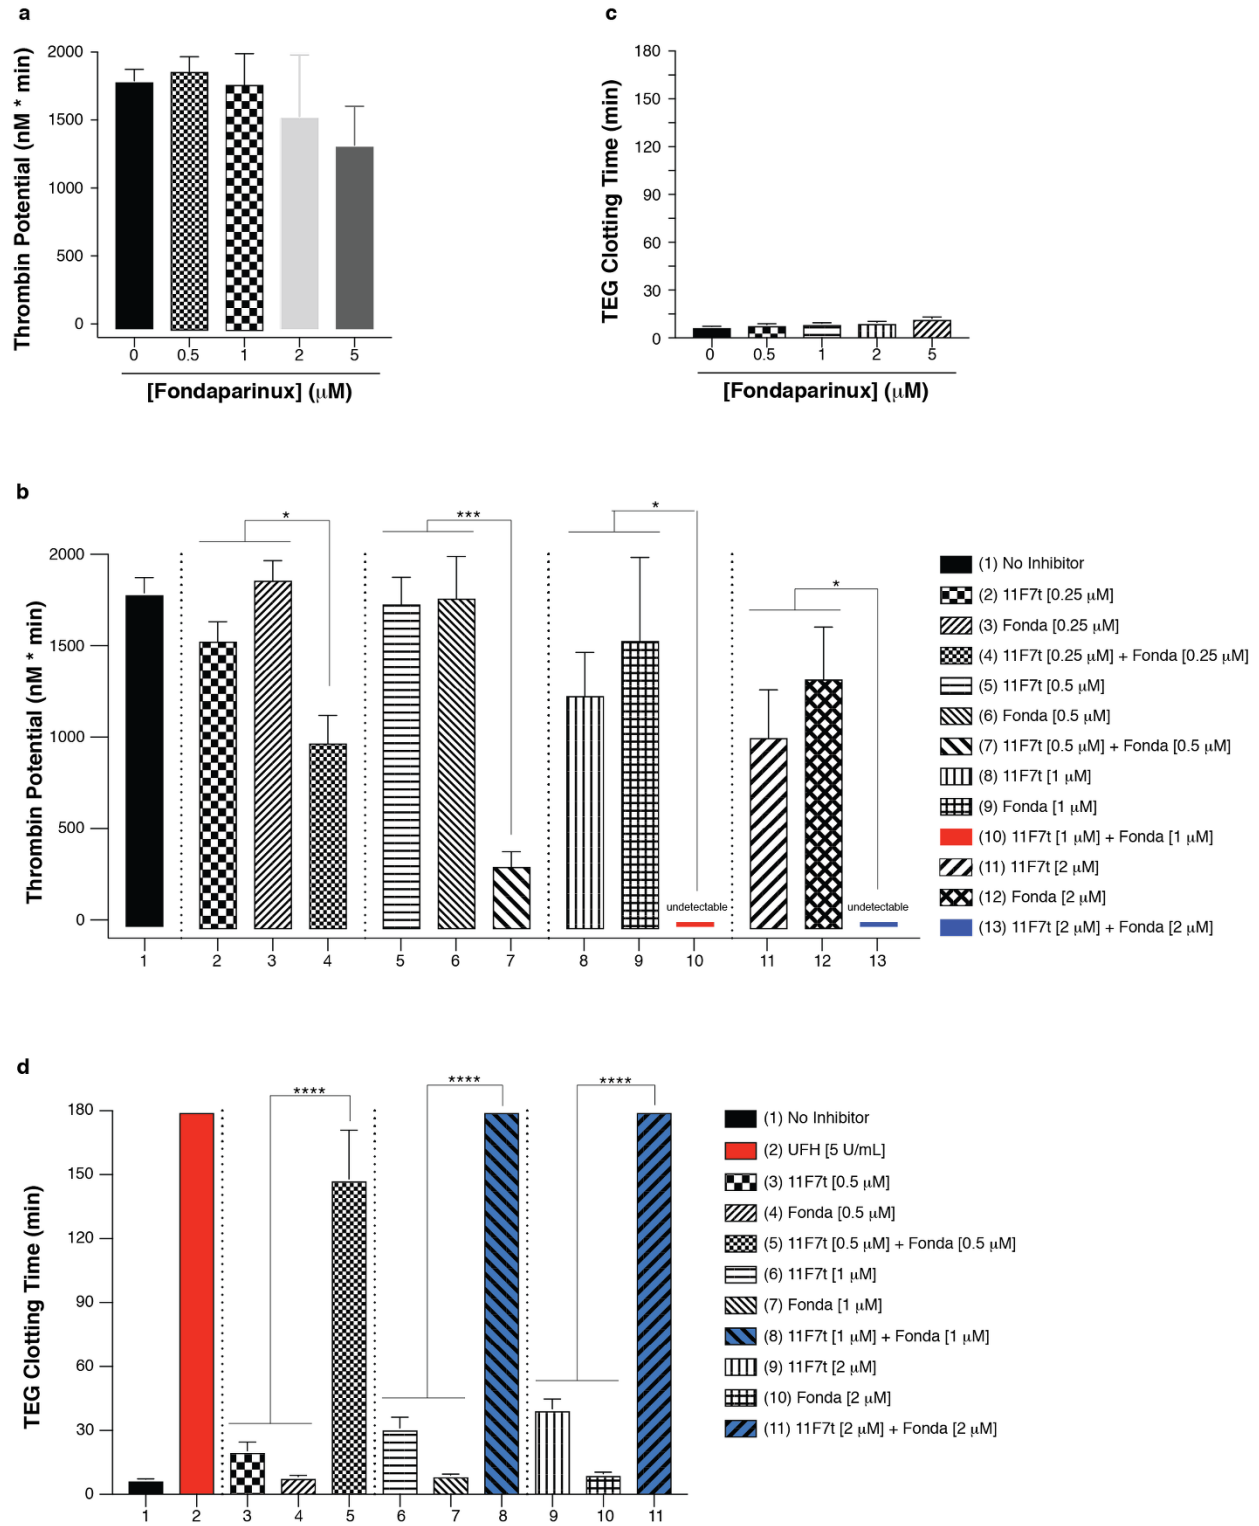



Figure S9

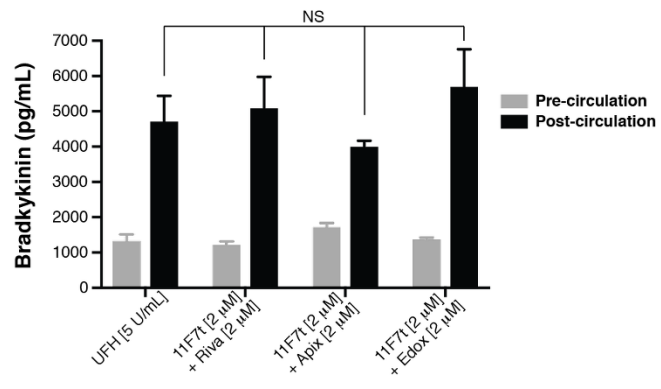

Figure S10

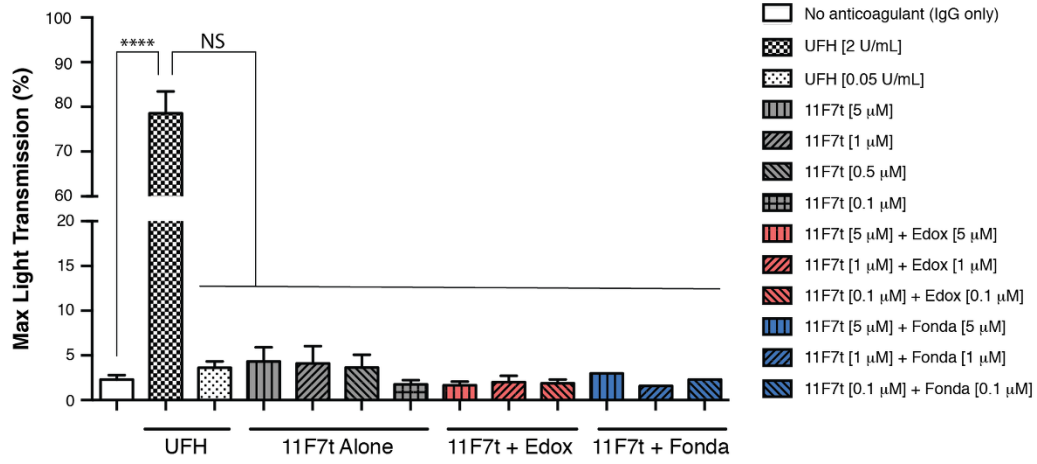

Supplement: NIHMS975297-supplement-Supplementary_Figures_S1-S10.pdf [file NIHMS975297-supplement-Supplementary_Figures_S1-S10.pdf]
